# Supplementary material for: Perioperative Vascular Biomarker Profiling in Elective Surgery Patients Developing Postoperative Delirium: A Prospective Cohort Study
Source: MDPI journal article supplement (doi:10.3390/biomedicines9050553), 2021-05-15
Supplement: s1 [file s1]

**Supplemental Table S1: Pre- and postoperative serum biomarker profiling**

|                                    | Preoperative (pg/mL)       | Postoperative (pg/mL)       | <i>p</i> value    |
|------------------------------------|----------------------------|-----------------------------|-------------------|
| <b><i>Vascular activation/</i></b> |                            |                             |                   |
| <b><i>permeability:</i></b>        |                            |                             |                   |
| E-Selectin                         | 29945 (20522 - 43614)      | 21461 (14886 - 34171)       | <b>&lt;0.0001</b> |
| ICAM-1                             | 224783 (166416 - 381149)   | 209646 (153892 - 338841)    | <b>&lt;0.0001</b> |
| VCAM-1                             | 1121475 (853534 - 1727897) | 1439545 (1097545 - 2050708) | <b>&lt;0.0001</b> |
| SDC1                               | 1910 (1477 - 2818)         | 2662 (1808 - 3958)          | <b>&lt;0.0001</b> |
| THBD                               | 6878 (5302 - 8262)         | 6336 (5217 - 7795)          | <b>0.0064</b>     |
| ANGPT2                             | 2115 (1532 - 3196)         | 2657 (1735 - 3730)          | <b>0.0002</b>     |
| TIE2                               | 13859 (10919 - 17791)      | 9748 (6672 - 13381)         | <b>&lt;0.0001</b> |
| <b><i>Inflammation:</i></b>        |                            |                             |                   |
| IL-8                               | 12.05 (5.28 - 23.16)       | 24.48 (13.16 - 39.51)       | <b>&lt;0.0001</b> |
| CCL2                               | 324.5 (254.3 - 439.1)      | 435.8 (277.2 - 779.8)       | <b>&lt;0.0001</b> |
| RAGE                               | 2244 (1481 - 3077)         | 2641 (1838 - 3561)          | <b>0.0072</b>     |
| Resistin                           | 16375 (11268 - 23379)      | 24835 (18029 - 35389)       | <b>&lt;0.0001</b> |
| CXCL5                              | 673.0 (248.9 - 1062)       | 523.6 (232.1 - 919.8)       | <b>0.0008</b>     |
| uPAR                               | 215.3 (109.3 - 350.3)      | 250 (11.3 - 400.1)          | <b>0.1469</b>     |
| NSE                                | 18758 (11204 - 29300)      | 25204 (17293 - 45056)       | <b>&lt;0.0001</b> |

Data are given as median values with 25<sup>th</sup> and 75<sup>th</sup> percentile and were compared using Wilcoxon rank-sum test. n = 118

ICAM-1 = Intercellular Adhesion Molecule 1, VCAM-1 = Vascular Cell Adhesion Protein 1, SDC1 = Syndecan-1, THBD = Thrombomodulin, ANGPT2 = Angiopoietin-2, TIE2 = Tyrosine Kinase with Immunoglobulin-like and EGF-like domains 2, IL-8 = Interleukin-8, CCL2 = CC-chemokine Ligand 2, RAGE = Receptor for Advanced Glycation Endproducts, CXCL5 = C-X-C Motif Chemokine 5, uPAR = Urokinase Plasminogen Activator Surface Receptor, NSE = Neuron-specific Enolase
