# Supplementary material for: Perioperative Vascular Biomarker Profiling in Elective Surgery Patients Developing Postoperative Delirium: A Prospective Cohort Study
Source: MDPI journal article supplement (doi:10.3390/biomedicines9050553), 2021-05-15
Supplement: s1 [file s1]

**Supplemental Table S4: Pre- and postoperative serum biomarker profiling (no-POD and POD) following propensity score matching**

|                                    | <i>Preoperative</i>        |                            |                | <i>Postoperative</i>        |                             |                |
|------------------------------------|----------------------------|----------------------------|----------------|-----------------------------|-----------------------------|----------------|
|                                    | no-POD (n = 33)            | POD (n = 33)               | <i>p value</i> | no-POD (n = 33)             | POD (n = 33)                | <i>p value</i> |
| <b><i>Vascular activation/</i></b> |                            |                            |                |                             |                             |                |
| <b><i>permeability:</i></b>        |                            |                            |                |                             |                             |                |
| E-Selectin                         | 30316 (17996 - 37610)      | 36796 (22619 - 52220)      | 0.16           | 21597 (14148 - 32771)       | 26411 (16729 - 35875)       | 0.35           |
| ICAM-1                             | 213139 (164919 - 532964)   | 233475 (160310 - 387719)   | 0.87           | 206570 (152350 - 389457)    | 221653 (139500 - 333811)    | 0.99           |
| VCAM-1                             | 1178782 (959076 - 1914238) | 1257490 (872532 - 1816731) | 0.34           | 1598081 (1304911 - 2058955) | 1727963 (1083363 - 2326175) | 0.61           |
| SDC1                               | 2387 (1458 - 3703)         | 1891 (1556 - 3343)         | 0.47           | 2783 (2260 - 4037)          | 3139 (2072 - 4102)          | 0.52           |
| THBD                               | 7411 (5349 - 8353)         | 7168 (5820 - 9508)         | 0.32           | 6393 (5550 - 7761)          | 6642 (5297 - 8338)          | 0.55           |
| ANGPT2                             | 2058 (1393 - 3312)         | 1883 (1432 - 3192)         | 0.51           | 2297 (1400 - 3980)          | 2368 (1362 - 3573)          | 0.61           |
| TIE2                               | 12521 (10659 - 16925)      | 14078 (10913 - 19649)      | 0.24           | 7803 (5540 - 10822)         | 7970 (5245 - 11794)         | 0.62           |
| <b><i>Inflammation:</i></b>        |                            |                            |                |                             |                             |                |
| IL-8                               | 15.43 (9.44 - 30.08)       | 13.98 (7.895 - 22.48)      | 0.24           | 25.72 (15.55 - 50.26)       | 33.15 (17.32 - 49.95)       | 0.51           |
| CCL2                               | 312.4 (268.3 - 403.8)      | 324.3 (253.3 - 456.7)      | 0.48           | 366.7 (267.5 - 744.8)       | 675.6 (286.1 - 1600.0)      | <b>0.01</b>    |
| RAGE                               | 2398 (1666 - 3198)         | 2159 (1503 - 3624)         | 0.53           | 2568 (1934 - 3515)          | 2789 (1973 - 3685)          | 0.23           |
| Resistin                           | 14548 (10545 - 22408)      | 18374 (12754 - 23707)      | 0.54           | 22724 (16912 - 35638)       | 23530 (17638 - 37011)       | 0.70           |
| CXCL5                              | 704.1 (331.0 - 1184.0)     | 594.3 (171.0 - 954.4)      | 0.34           | 560.9 (263.4 - 810.2)       | 347.1 (231.6 - 892.7)       | 0.71           |
| uPAR                               | 199.2 (103.5 - 335.4)      | 197.8 (78.21 - 373.7)      | 0.93           | 258.3 (141.9 - 336.5)       | 207.1 (96.56 - 382.6)       | 0.74           |
| NSE                                | 16860 (11597 - 23030)      | 15875 (8262 - 25806)       | 0.76           | 20092 (16269 - 24845)       | 23317 (14812 - 43536)       | 0.26           |

Data are given as median values with 25<sup>th</sup> and 75<sup>th</sup> percentile and were compared using Wilcoxon rank-sum test.

ICAM-1 = Intercellular Adhesion Molecule 1, VCAM-1 = Vascular Cell Adhesion Protein 1, SDC1 = Syndecan-1, THBD = Thrombomodulin, ANGPT2 = Angiopoietin-2, TIE2 = Tyrosine Kinase with Immunoglobulin-like and EGF-like domains 2, IL-8 = Interleukin-8, CCL2 = CC-chemokine Ligand 2, RAGE = Receptor for Advanced Glycation Endproducts, CXCL5 = C-X-C Motif Chemokine 5, uPAR = Urokinase Plasminogen Activator Surface Receptor, NSE = Neuron-specific Enolase
