# Supplementary material for: Perioperative Vascular Biomarker Profiling in Elective Surgery Patients Developing Postoperative Delirium: A Prospective Cohort Study
Source: MDPI journal article supplement (doi:10.3390/biomedicines9050553), 2021-05-15
Supplement: s1 [file s1]

**Supplemental Table S3: Pre- and postoperative serum biomarker profiling (no-POD and POD)**

|                                    | <i>Preoperative</i>        |                            |                | <i>Postoperative</i>        |                             |                |
|------------------------------------|----------------------------|----------------------------|----------------|-----------------------------|-----------------------------|----------------|
|                                    | no-POD (n = 85)            | POD (n = 33)               | <i>p value</i> | no-POD (n = 85)             | POD (n = 33)                | <i>p value</i> |
| <b><i>Vascular activation/</i></b> |                            |                            |                |                             |                             |                |
| <b><i>permeability:</i></b>        |                            |                            |                |                             |                             |                |
| E-Selectin                         | 27238 (19896 - 37631)      | 36796 (22719 - 52220)      | 0.06           | 20743 (14505 - 33214)       | 26411 (16729 - 35875)       | 0.17           |
| ICAM-1                             | 219620 (170122 - 388059)   | 233475 (160310 - 387719)   | 0.97           | 208526 (157019 - 339071)    | 221653 (139500 - 333811)    | 0.71           |
| VCAM-1                             | 1038317 (846982 - 1671950) | 1257490 (872532 - 1816731) | 0.27           | 1422086 (1097336 - 1888507) | 1727963 (1083363 - 2326175) | 0.23           |
| SDC1                               | 2006 (1405 - 2767)         | 1891 (1556 - 3343)         | 0.71           | 2451 (1706 - 3836)          | 3139 (2072 - 4102)          | 0.07           |
| THBD                               | 6453 (5246 - 8084)         | 7168 (5820 - 9508)         | 0.10           | 6228 (5108 - 7677)          | 6642 (5297 - 8338)          | 0.36           |
| ANGPT2                             | 2224 (1594 - 3198)         | 1883 (1432 - 3192)         | 0.45           | 2730 (1813 - 3816)          | 2368 (1362 - 3573)          | 0.29           |
| TIE2                               | 13791 (10916 - 17138)      | 14078 (10913 - 19649)      | 0.63           | 10263 (6775 - 14018)        | 7970 (5245 - 11794)         | 0.07           |
| <b><i>Inflammation:</i></b>        |                            |                            |                |                             |                             |                |
| IL-8                               | 11.77 (3.11 - 24.38)       | 13.98 (7.90 - 22.48)       | 0.51           | 24.08 (12.81 - 35.55)       | 33.15 (17.32 - 49.95)       | 0.08           |
| CCL2                               | 324.8 (256.0 - 433.2)      | 324.3 (253.3 - 456.7)      | 0.97           | 385.2 (271.2 - 635.7)       | 675.6 (286.1 - 1600)        | <b>0.03</b>    |
| RAGE                               | 2256 (1438 - 2948)         | 2159 (1503 - 3624)         | 0.32           | 2424 (1786 - 3457)          | 2789 (1973 - 3685)          | 0.27           |
| Resistin                           | 15992 (11114 - 23467)      | 18374 (12754 - 23707)      | 0.76           | 26647 (18165 - 35119)       | 23530 (17638 - 37011)       | 0.98           |
| CXCL5                              | 700.2 (301.5 - 1076)       | 594.3 (171.0 - 954.4)      | 0.48           | 584.3 (224.1 - 984.8)       | 347.1 (231.6 - 892.7)       | 0.31           |
| uPAR                               | 222.1 (114.9 - 350.7)      | 197.8 (78.2 - 373.7)       | 0.54           | 263.8 (137.4 - 425.4)       | 207.1 (96.56 - 382.6)       | 0.28           |
| NSE                                | 19986 (11736 - 30321)      | 15875 (8262 - 25806)       | 0.15           | 25289 (18995 - 45945)       | 23317 (14812 - 43536)       | 0.39           |

Data are given as median values with 25<sup>th</sup> and 75<sup>th</sup> percentile and were compared using Mann-Whitney U test.

ICAM-1 = Intercellular Adhesion Molecule 1, VCAM-1 = Vascular Cell Adhesion Protein 1, SDC1 = Syndecan-1, THBD = Thrombomodulin, ANGPT2 = Angiopoietin-2, TIE2 = Tyrosine Kinase with Immunoglobulin-like and EGF-like domains 2, IL-8 = Interleukin-8, CCL2 = CC-chemokine Ligand 2, RAGE = Receptor for Advanced Glycation Endproducts, CXCL5 = C-X-C Motif Chemokine 5, uPAR = Urokinase Plasminogen Activator Surface Receptor, NSE = Neuron-specific Enolase
