# Supplementary material for: Perioperative Vascular Biomarker Profiling in Elective Surgery Patients Developing Postoperative Delirium: A Prospective Cohort Study
Source: MDPI journal article supplement (doi:10.3390/biomedicines9050553), 2021-05-15
Supplement: s1 [file s1]

**Supplemental Table S2: Patient and procedural details (no-POD and POD)**

| Parameter                                 | no-POD             | POD                | <i>p value</i> |
|-------------------------------------------|--------------------|--------------------|----------------|
| <b>Patient details:</b>                   |                    |                    |                |
| n (%)                                     | 85 (72)            | 33 (28)            |                |
| Age (years)                               | 71 (66 - 77)       | 73 (68 - 80)       | 0.2782         |
| Male gender (n [%])                       | 42 (49)            | 28 (85)            | <b>0.0004</b>  |
| Body mass index (kg/m <sup>2</sup> )      | 27.7 (24.2 - 31.2) | 26.3 (24.5 - 28.9) | 0.1896         |
| ASA status:                               |                    |                    |                |
| I (n [%])                                 | 2 (2.4)            | 1 (3.0)            | >0.9999        |
| II (n [%])                                | 30 (35.3)          | 5 (15.1)           | <b>0.0425</b>  |
| III (n [%])                               | 45 (52.9)          | 25 (75.8)          | <b>0.0359</b>  |
| IV (n [%])                                | 8 (9.4)            | 2 (6.1)            | 0.7237         |
| <b>Preop. routine laboratory values:</b>  |                    |                    |                |
| Hemoglobin (g/dl)                         | 13.4 (11.9 - 14.5) | 13.4 (12.4 - 14.5) | 0.9845         |
| HbA <sub>1c</sub> (%)                     | 5.6 (5.4 - 6.0)    | 5.7 (5.3 - 6.5)    | 0.3937         |
| Leukocyte count (G/l)                     | 7.1 (6.0 - 9.0)    | 6.7 (5.7 - 7.6)    | 0.1916         |
| Sodium (mmol/l)                           | 140 (138 - 142)    | 141 (139 - 142)    | 0.0732         |
| Potassium (mmol/l)                        | 4.5 (4.1 - 4.8)    | 4.3 (4.0 - 4.6)    | 0.1116         |
| Creatinine (mg/dl)                        | 0.9 (0.79 - 1.05)  | 0.9 (0.77 - 1.09)  | 0.8010         |
| C-reactive protein (mg/l)                 | 2.9 (1.1 - 7.4)    | 4.2 (1.3 - 14.0)   | 0.4384         |
| Total protein (g/l)                       | 70 (65 - 73)       | 68 (65 - 74)       | 0.8656         |
| HS cardiac troponin T (ng/l)              | 12.0 (7.5 - 19.1)  | 14.5 (8.9 - 21.9)  | 0.1896         |
| NT-proBNP (pg/ml)                         | 241 (108 - 648)    | 228 (141 - 1520)   | 0.3855         |
| <b>Procedural and anesthesia details:</b> |                    |                    |                |
| Surgical risk:                            |                    |                    |                |
| Low (n [%])                               | 10 (11.8)          | 1 (3.0)            | 0.1788         |
| Intermediate (n [%])                      | 36 (42.3)          | 11 (33.3)          | 0.4085         |
| High (n [%])                              | 39 (45.9)          | 21 (63.7)          | 0.1023         |
| Surgical specialty:                       |                    |                    |                |
| General (n [%])                           | 14 (17)            | 4 (12)             | 0.7763         |
| Orthopedic and trauma (n [%])             | 31 (37)            | 4 (12)             | <b>0.0126</b>  |
| Cardiac (n [%])                           | 19 (22)            | 18 (55)            | <b>0.0016</b>  |
| Thoracic (n [%])                          | 2 (2)              | 0 (0)              | >0.9999        |
| Vascular (n [%])                          | 1 (1)              | 3 (9)              | 0.0658         |
| Ear-nose-throat (n [%])                   | 9 (11)             | 2 (6)              | 0.7256         |
| Urologic (n [%])                          | 7 (8)              | 2 (6)              | >0.9999        |
| Plastic (n [%])                           | 2 (2)              | 0 (0)              | >0.9999        |
| Placement of epidural catheter (n [%])    |                    |                    |                |
| Duration of surgery (min)                 | 204 (132 - 278)    | 249 (168 - 336)    | 0.1324         |
| Duration of mechanical ventilation (h)    | 5.1 (3.4 - 10.8)   | 11.0 (4.6 - 26.1)  | <b>0.0017</b>  |
| Postoperative admission to ICU (n [%])    | 41 (48)            | 25 (76)            | <b>0.0076</b>  |
| Length of hospital stay (days)            | 13 (9 - 20)        | 14 (10 - 28)       | 0.2015         |

Data are given as percentage values (of subcohort) or as median values with 25<sup>th</sup> and 75<sup>th</sup> percentile, respectively. Data were compared using Fisher's exact test or Mann-Whitney U test, respectively.

ASA = American Society of Anaesthesiologists, HS cardiac troponin T = High-sensitive cardiac troponin T, NT-proBNP = N-terminal prohormone of brain natriuretic peptide, ICU = Intensive Care Unit
